# Supplementary material for: Recent progress and perspectives on physiological and molecular mechanisms underlying cold tolerance of tea plants
Source: Front Plant Sci. 2023 Feb 14;14:1145609. doi: 10.3389/fpls.2023.1145609 (PMC9971632; doi:10.3389/fpls.2023.1145609)
Supplement: Supplementary file 1 [file DataSheet_1.xlsx]

## Sheet: Sheet1
Supplementary Table 1. Gene families involved in cold tolerance of tea plants.
No.	Family	Gene symbol	Full name	Functional description	Authors/Year	Title	Journal
1	RAV	087-RAV, 088-RAV	related to ABA insensitive 3/viviparous	play important roles in abnormal temperature stress response	Wu et al., 2015	Transcriptome-based discovery of AP2/ERF transcription factors related to temperature stress in tea plant (Camellia sinensis)	Functional and Integrative Genomics
2	GSP	GSP1.2, GSP2, GSP4	β-1, 3-glucanase	synthesis of cell wall, possibly participate in the upstream regulation of cold resistance pathway in tea plants	Wang, 2001; Chen, 2016	Clonig and sequence analysis of β-1, 3-glucanase gene in tea plants; Clonig and cold resistance analysis of β-1, 3-glucanase gene (Mugsps) from wild banana (In Chinese)	[D]Anhui Agricultural University; [D]Fujian Agriculture And Forestry University
3	CAMTA	CAMTA1, CAMTA2, CAMTA3, CAMTA4, CAMTA5	calmodulin-binding transcription activator	calcium signaling activators in cold stress	Zhou et al., 2022	Identification and Expression Analysis of CAMTA Genes in Tea Plant Reveal Their Complex Regulatory Role in Stress Responses	Frontiers in Plant Science
4	GARP	APRR, ARR-B1b, BOA1, GLK1, GLK2, KAN1d, KAN1e, NIGT2d, NIGT1b, NIGT1c, PCL1, PHL2b, PHL4a	Golden2, ARR-B, Psr1	in response to abiotic stresses such as cold stress	Yue et al., 2022	Genome-Wide Identification and Characterization of GARP Transcription Factor Gene Family Members Reveal Their Diverse Functions in Tea Plant (Camellia sinensis)	Frontiers in Plant Science
5	NLR	NLR1-173	nucleotide-binding leucine-rich repeats	induced by cold stress	Wang et al., 2020	Genome-wide identification, characterization, and expression analysis of nucleotide-binding leucine-rich repeats gene family under environmental stresses in tea (Camellia sinensis)	Genomics
6	SAP	SAP12	stress-associated proteins	in response to cold and drought stress in tea plants	Fan et al., 2022	Genome-Wide Analyses of Tea Plant Stress-Associated Proteins (SAPs) Reveal the Role of CsSAP12 in Increased Drought Tolerance in Transgenic Tomatoes	Horticulturae
7	SDIR	SDIR1	salt anddrought induced ring finger	up-regulated by cold stress	Yue et al., 2018	Cloning and expression of RING-finger E3 ubiquitin ligase CsSDIR1 gene in tea plant (Camellia sinensis)(In Chinese)	Fujian Agriculture And Forestry University/key Laboratory Of Tea Science In Universities Of Fujian Province
8	BES1	BES1-1, BES1-7, BES1-8, BES1-9	brassinosteroid insensitive 1-EMS-supressor 1	BR signaling, involved in plant growth and development and stress response	Chen et al., 2019	Genome-wide identification and analysis of BES1 transcription factor family in Camellia sinensis (In Chinese)	Acta Botanica Boreali-occidentalia Sinica
9	C2H2-ZFP	CSS0048317, CSS0030854, CSS0040273, CSS0018552, CSS0020370	C2H2-zinc finger protein	essential for the regulation of plant development and widely responsive to diverse stresses	Zhang etal., 2021	Genome-Wide Identification and Expression Patterns of the C2H2-Zinc Finger Gene Family Related to Stress Responses and Catechins Accumulation in Camellia sinensis [L.] O. Kuntze	International Journal Of Molecular Sciences
10	CIGR	CIGR	chitin-inducible gibberellin-responsive	play important roles in the response of C. sinensis to stresses	Wang et al., 2019	Clonig and Expression Profiles Analysis of CsCIGR Gene in Camellia sinensis(In Chinese)	Acta Botanica Boreali-occidentalia Sinica
11	CPP	CPP1-7	Cysteine-rich polycomb-like	plays key role in plant development and stress response	Nan et al., 2021	Comprehensive genomic analysis and expression profiling of cysteine-rich polycomb-like transcription factor gene family in tea tree	Horticultural Plant Journal
12	FHY3	FRS-1-18,FRS-20-23,FRS-25	far-red elongated hypocotyl 3	phytochrome signaling pathway	Liu et al., 2021	Genome-Wide identification and characterization of the CsFHY3/FAR1 gene family and expression analysis under biotic and abiotic stresses in tea plants (Camellia sinensis)	Plants
13	FAR1	FRS-1-18,FRS-20-23,FRS-25	far-red-impairedresponse 1	phytochrome signaling pathway	Liu et al., 2021	Genome-Wide identification and characterization of the CsFHY3/FAR1 gene family and expression analysis under biotic and abiotic stresses in tea plants (Camellia sinensis)	Plants
14	DELLA	GAI, RGA1, RGL1, RGL2, RGL3	gibberellic acid insensitive	gibberellic acid mediated signaling pathway	Han et al., 2020	Identification and expression analysis of the DELLA gene family in Camellia sinensis ( L．) O． Ktze．(In Chinese)	Plant Science Journal
15	DREB	DREB1A, DREB1B, DREB1C	dehydration responsive element binding factor	on/off switches of cold response	Zhou et al., 2022	Functional Characterization of Tea Plant (Camellia sinensis L.) CsCBF2 Gene Involved in Multiple Abiotic Stress Response in Tobacco (Nicotiana tabacum L.)	Horticulturae
16	GRF	GRF1-6	growth-regulating factor	regulate leaf development	Wu et al., 2017	Developmental processes and responses to hormonal stimuli in tea plant (Camellia sinensis) leaves are controlled by GRF and GIF gene families	Functional & Integrative Genomics
17	MYB	MYB45, MYB46, MYB105,	v-myb avian myeloblastosis viral oncogene homolog	adverse effects on plant growth and development	Han et al., 2022	CsMYB Transcription Factors Participate in Jasmonic Acid Signal Transduction in Response to Cold Stress in Tea Plant (Camellia sinensis)	Plants-basel
18	NAC	NAC2, NAC9, NAC12, NAC17, NAC18, NAC26, NAC29, NAC30, NAC32	NAM、ATAF1/2、CUC2	top classes of transcription factors differentially expressed in the different cold-injured tea leaves	Ni et al., 2022; Wang et al., 2016	Integrative Transcriptomic and Phytohormonal Analyses Provide Insights into the Cold Injury Recovery Mechanisms of Tea Leaves; Transcriptome-Wide Identification and Expression Analysis of the NAC Gene Family in Tea Plant [Camellia sinensis (L.) O. Kuntze]	Plants-basel; PloS One
19	WOX	WOX9, WOX14	WUSCHEL-related homeobox	regulate plant developmental processes, especially those involved in embryogenesis	Wang et al., 2019	Genome-wide identification of WOX genes and their expression patterns under different hormone and abiotic stress treatments in tea plant (Camellia sinensis)	Trees-structure And Function
20	ZF-HD	ZF-HD1-18	zinc finger motif-associated homeodomain	play indispensable roles in developmental processes and stress responses	Zhou et al., 2021	Genome-wide analysis of zinc finger motif-associated homeodomain (ZF-HD) family genes and their expression profiles under abiotic stresses and phytohormones stimuli in tea plants (Camellia sinensis)	Scientia Horticulturae
21	bHLH	bHLH007, bHLH012, bHLH021, bHLH043, bHLH045, bHLH079, bHLH093, bHLH095, bHLH116	basic helix-loop-helix	involved in various signal transductions and secondary metabolism	Cui et al., 2018	Transcriptome-wide identification and expression profile analysis of the bHLH family genes in Camellia sinensis	Functional & Integrative Genomics
22	bZIP	bZIP6, bZIP18	basic leucine zipper	regulator of freezing tolerance	Wang et al., 2017	Identification of a novel bZIP transcription factor in Camellia sinensis as a negative regulator of freezing tolerance in transgenic arabidopsis	Annals of Botany
23	CBF	CBF1, CBF2, CBF3, CBF5	C-repeat binding transcription factor	on/off switches of cold response	Chang et al., 2012; Yin et al., 2016; Zhang et al., 2022b; Zhou et al., 2022a	Eukaryotic expression and cold-resistance analysis of CsCBF1 from tea plant (Camellia sinensis); Functional analysis of CsCBF3 transcription factor in tea plant (Camellia sinensis) under cold stress; Functional Characterization of Tea Plant (Camellia sinensis L.) CsCBF2 Gene Involved in Multiple Abiotic Stress Response in Tobacco (Nicotiana tabacum L.); CsCBF5 depletion impairs cold tolerance in …	J Northwest A&F University; Plant Growth Regulation; Horticulturae; Plant Science
24	ICE	ICE1	inducer of CBF expression	major activator for CBF	Wang et al., 2012	CsICE1 and CsCBF1: two transcription factors involved in cold responses in Camellia sinensis	Plant Cell Reports
25	WRKY	WRKY29,WRKY37	WRKY transcription factors	play functional roles in cold tolerance of tea plant	Zhao et al., 2022	Characterization of CsWRKY29 and CsWRKY37 transcription factors and their functional roles in cold tolerance of tea plant	Beverage Plant Research
26	HSF	TEA018554, TEA02299, TEA012764, TEA023633, TEA005927	heat shock transcription factor	key regulators in plant abotic stress response	Xu et al., 2020	New Insights into Evolution of Plant Heat Shock Factors (Hsfs) and Expression Analysis of Tea Genes in Response to Abiotic Stresses	Plants-basel
27	AMY	AMY1, AMY2	alpha-amylase	starch degradation	Yue at al., 2019	Expression patterns of alpha-amylase and beta-amylase genes provide insights into the molecular mechanisms underlying the responses of tea plants (Camellia sinensis) to stress and postharvest processing treatments	Planta
28	BAM	BAM3, BAM4, BAM5, BAM8, BAM9	beta-amylase	starch degradation	Yue et al., 2019	Expression patterns of alpha-amylase and beta-amylase genes provide insights into the molecular mechanisms underlying the responses of tea plants (Camellia sinensis) to stress and postharvest processing treatments	Planta
29	FRK	FRK6, FRK7	fructokinases	carbohydrate metabolism and sugar signaling	Li et al., 2017	Isolation and expression features of hexose kinase genes under various abiotic stresses in the tea plant (Camellia sinensis)	Journal Of Plant Physiology
30	GLU	GLU	beta-glucosidase	sugar metabolism	NA	our RNAseq data	NA
31	GolS	GolS1	galactinol synthase	sugar metabolism	Chuan et al., 2015; Zhou et al., 2017	Effects of cold acclimation on sugar metabolism and sugar‑related gene expression in tea plant during the winter season; Molecular Cloning and Characterization of Galactinol Synthases in Camellia sinensis with Different Responses to Biotic and Abiotic Stressors	Plant Molecular Biology; Journal of Agricultural and Food Chemistry
32	HXK	HXK2, HXK3, HXK4	hexokinase	carbohydrate metabolism and sugar signaling	Li et al., 2017	Isolation and expression features of hexose kinase genes under various abiotic stresses in the tea plant (Camellia sinensis)	Journal Of Plant Physiology
33	TPP	TPP	Tre-6-phosphate phos phorylase	sugar metabolism	Chuan et al., 2015	Effects of cold acclimation on sugar metabolism and sugar‑related gene expression in tea plant during the winter season	Plant Molecular Biology
34	RS	RS2	raffinose synthase	sugar metabolism	Chuan et al., 2015	Effects of cold acclimation on sugar metabolism and sugar‑related gene expression in tea plant during the winter season	Plant Molecular Biology
35	INV	INV5	invertase	sugar metabolism	Chuan et al., 2015	Effects of cold acclimation on sugar metabolism and sugar‑related gene expression in tea plant during the winter season	Plant Molecular Biology
36	UGT	UGT78A15, UGT91Q2	UDP-glucosyltransferase	Sesquiterpene glucosylation	Zhao et al., 2019 and 2020	Cold stress-induced glucosyltransferase CsUGT78A15 is involved in the formation of eugenol glucoside in Camellia sinensis; Sesquiterpene glucosylation mediated by glucosyltransferase UGT91Q2 is involved in the modulation of cold stress tolerance in tea plants	New Phytologist
37	SUT	SUT1, SUT2, SUT3, SUT4	Suc transporter	Suc transporter	Chuan et al., 2015	Effects of cold acclimation on sugar metabolism and sugar‑related gene expression in tea plant during the winter season	Plant Molecular Biology
38	TIP	TIP1:3	tonoplast intrinsic protein	play a vital role in water transport across membranes	Yue et al., 2014	Molecular cloning and expression analysis of tea plant aquaporin (AQP) gene family	Plant Physiology And Biochemistry
39	TMT	TMT1	tonoplast monosaccharide transporter	tonoplast monosaccharide transporter	Chuan et al., 2015	Effects of cold acclimation on sugar metabolism and sugar‑related gene expression in tea plant during the winter season	Plant Molecular Biology
40	SCAF	SCAF	supercomplex assembly factor 1	sugar metabolism	Zhang et al., 2022	Systematic evaluation on cold resistance of tea plant (In Chinese)	CHINATEA
41	SWEET	SWEET1, SWEET2, SWEET3, SWEET16, SWEET17	sugars will eventually be exported transporter	sugar transporter	Chuan et al., 2015	Effects of cold acclimation on sugar metabolism and sugar‑related gene expression in tea plant during the winter season	Plant Molecular Biology
42	PMI	PMI	phosphomannose isomerase	involved in the AsA biosynthetic pathway	Li et al., 2016	Expression profile analysis of ascorbic acid-related genes in response to temperature stress in the tea plant, Camellia sinensis (L.) O. Kuntze	Genetics And Molecular Research
43	SUS	SUS1, SUS2, SUS3, SUS4	SUS synthase	Suc metabolism	Chuan et al., 2015	Effects of cold acclimation on sugar metabolism and sugar‑related gene expression in tea plant during the winter season	Plant Molecular Biology
44	SPS	SPS	Suc-phosphate synthase	sugar metabolism	Chuan et al., 2015	Effects of cold acclimation on sugar metabolism and sugar‑related gene expression in tea plant during the winter season	Plant Molecular Biology
45	PMM	PMM	phosphomannomutase	required for the synthesis AsA	Zhang et al., 2022	Systematic evaluation on cold resistance of tea plant (In Chinese)	CHINATEA
46	AOX	AOX1a, AOX1d, AOX2b	alternative oxidase	terminal oxidase located in the respiratory electron transport chain	Ding et al., 2018	Genome-wide identification and characterization of ALTERNATIVE OXIDASE genes and their response under abiotic stresses in Camellia sinensis (L.) O. Kuntze	PLANTA
47	C5-MTase	MET, CMT, DRM, DNMT2	cytosine-5 DNA methyltransferase	DNA methylation	Zhu et al., 2020; Tong et al., 2021	Genome-wide investigation and transcriptional analysis of cytosine-5 DNA methyltransferase and DNA demethylase gene families in tea plant (Camellia sinensis) under abiotic stress and withering processing; Divergent DNA methylation contributes to duplicated gene evolution and chilling response in tea plants	Peerj; The Plant journal
48	CIPK	CsCIPK4/6a/6b/7/11/14b/19/20, CsCIPK1/5/8/10a/10b/10c/12/14a/23a/24/25	CBL-interacting protein kinase	involved in regulating plant responses to various environmental stimuli	Wang et al., 2020	Characterization of CBL-CIPK signaling complexes and their involvement in cold response in tea plant	Plant Physiology And Biochemistry
49	CPK	CPK	calcium-dependent protein kinase	involved in regulating plant responses to various environmental stimuli	NA	our RNAseq data	NA
50	CSD	CSD1	copper/zinc superoxide dismutase	detoxify superoxide radicals	Guo et al., 2018	Cloning and expression of the copper/zinc-superoxide dismutase 1 gene and its promoter under low temperature stress in Camellia sinensis (In Chinese)	Chinese Journal of Applied and Environmental Biology
51	dMTase	ROS, DME, DML	DNA demethylase	DNA demethylation	Zhu et al., 2020; Tong et al., 2021	Genome-wide investigation and transcriptional analysis of cytosine-5 DNA methyltransferase and DNA demethylase gene families in tea plant (Camellia sinensis) under abiotic stress and withering processing; Divergent DNA methylation contributes to duplicated gene evolution and chilling response in tea plants	PeerJ; The Plant journal
52	MKK	TEA012409.1, TEA024893.1, TEA007510.1, TEA015514.1	mitogen activated protein kinase kinase	signal transduction in response to various abiotic factors	Chatterjee et al., 2020	MAPK cascade gene family in Camellia sinensis:In-silicoidentification, expression profiles and regulatory network analysis	BMC Genomics
53	MPK	TEA006436.1, TEA006436.1, TEA006436.1, TEA006436.1, TEA007103.1, TEA012905.1, TEA012905.1, TEA012905.1, TEA012905.1, TEA012905.1, TEA012905.1, TEA012905.1, TEA015676.1, TEA015676.1, TEA015676.1, TEA015676.1, TEA015676.1, TEA015676.1, TEA015676.1, TEA016315.1, TEA018880.1, TEA018880.1, TEA018880.1, TEA018880.1, TEA018880.1, TEA018880.1, TEA018880.1, TEA018880.1, TEA021759.1, TEA021759.1, TEA021759…	mitogen activated protein kinase	signal transduction in response to various abiotic factors	Chatterjee et al., 2020	MAPK cascade gene family in Camellia sinensis:In-silicoidentification, expression profiles and regulatory network analysis	BMC Genomics
54	PLD	PLDδ2, PLDδ3, PLDα2, PLDα3, PLDα5, PLDδ4, PLDβ1-2, PLDζ1, PLDα1, PLDβ3	Phospholipase D	plays important roles in plants growth, development, and response to environmental stresses	Roshan et al., 2021	Identification, evolution, expression analysis of phospholipase D (PLD) gene family in tea (Camellia sinensis)	Physiology And Molecular Biology Of Plants
55	SCPL	SCPL	serine carboxypeptidase-like	involved in the synthesis of ester-catechin	Chiu et al., 2016	Molecular identification and characterization of a serine carboxypeptidase-like gene associated with abiotic stress in tea plant, Camellia sinensis (L.)
56	DPE	DPE2	disproportionating enzyme	sugar metabolism	Chuan et al., 2015	Effects of cold acclimation on sugar metabolism and sugar‑related gene expression in tea plant during the winter season	Plant Molecular Biology
57	SNRK	SNRK1.2, SNRK1.3	sucrose nonfermenting-1(SNF1)-related kinase	sugar signal transduction	Chuan et al., 2015	Effects of cold acclimation on sugar metabolism and sugar‑related gene expression in tea plant during the winter season	Plant Molecular Biology
58	HDAC	RPD3/HDA1, SIR2, HD2	histone deacetylase	involved in growth, development and stress responses	Yuan et al., 2020	Genome-wide identification of the HDAC family proteins and functional characterization of CsHD2C, a HD2-type histone deacetylase gene in tea plant (Camellia sinensis L. O. Kuntze)	Plant Physiology Biochemistry
59	MIEL	MIEL1	MYB30-INTERACTING E3 LIGASE	reduced the accumulation of anthocyanin	Xing et al., 2021	Transcriptome-Wide Analysis and Functional Verification of RING-Type Ubiquitin Ligase Involved in Tea Plant Stress Resistance	Front Plant Sci
60	BAP	BAP	BRCA1-associated protein	deubiquitination	Zhang et al., 2022	Systematic evaluation on cold resistance of tea plant (In Chinese)	CHINATEA
61	RAC	RAC1	small GTPase	play an irreplaceable role in the tissue dynamics of cytoskeleton, vesicle transport and hormone signal transmission in plants	Xu et al., 2022	Camellia sinensis small GTPase gene (CsRAC1) involves in response to salt stress, drought stress and ABA signaling pathway	Gene
62	CAT	CAT	catalase	prevent oxidative damage caused by cold stress	Liu et al., 2021	Effect of selenium on tea (Camellia sinensis) under low temperature: Changes in physiological and biochemical responses and quality	Environmental And Experimental Botany
63	GPX	GPX	glutathione peroxidase	prevent oxidative damage caused by cold stress	Zhang et al., 2022	Systematic evaluation on cold resistance of tea plant (In Chinese)	CHINATEA
64	GST	GST	glutathione S-transferase	prevent oxidative damage caused by cold stress	Xu et al., 2022	Transcriptomic analysis reveals crucial biological pathways associated with cold response in Camellia weiningensis in Guizhou Province, China	Scientia Horticulturae
65	POD	POD	peroxidase	prevent oxidative damage caused by cold stress	Liu et al., 2021	Effect of selenium on tea (Camellia sinensis) under low temperature: Changes in physiological and biochemical responses and quality	Environmental And Experimental Botany
66	PPO	PPO	polyphenol oxidase	changed significantly with plucking season and shoot maturity	Olmez et al., 2010	Changes in chemical constituents and polyphenol oxidase activity of tea leaves with shoot maturity and cold storage	Journal Of Food Processing And Preservation
67	SOD	SOD	superoxide dismutase	prevent oxidative damage caused by cold stress	Liu et al., 2021	Effect of selenium on tea (Camellia sinensis) under low temperature: Changes in physiological and biochemical responses and quality	Environmental And Experimental Botany
68	GSHS	GSHS	glutathione peroxidase	prevent oxidative damage caused by cold stress	Zhang et al., 2022	Systematic evaluation on cold resistance of tea plant (In Chinese)	CHINATEA
69	GGP	GGP	GDP-L-galactose phosphowlase	required for the synthesis AsA	Li et al., 2013	Cloning and expression analysis of ASA biosynthsis related gene in camellia sinensis	[d]northwest A&f University
70	GME	GME	GDP-Mannose-3',5'epimerase	required for the synthesis AsA	Li et al., 2013	Cloning and expression analysis of ASA biosynthsis related gene in camellia sinensis	[d]northwest A&f University
71	GMP	GMP	GDP-D-Mannose-pyrophosphorylase	required for the synthesis AsA	Li et al., 2013	Cloning and expression analysis of ASA biosynthsis related gene in camellia sinensis	[d]northwest A&f University
72	GPP	GPP	L-galactose-1-phosphatase	required for the synthesis AsA	Li et al., 2013	Cloning and expression analysis of ASA biosynthsis related gene in camellia sinensis	[d]northwest A&f University
73	MIOX	MIOX	myo-inositol oxygenase	required for the synthesis AsA	Zhang et al., 2022	Systematic evaluation on cold resistance of tea plant (In Chinese)	CHINATEA
74	AGP	AGP	arabinogalactan-protein	required for cell walls remodeling and synthesis	NA	our RNAseq data	NA
75	ENODL	ENODL	early nodulin-like protein	required for cell walls remodeling and synthesis	NA	our RNAseq data	NA
76	AXY	AXY	alpha-xylosidase	required for cell walls remodeling and synthesis	NA	our RNAseq data	NA
77	API	API	altered nodule primordia invasion	required for cell walls remodeling and synthesis	NA	our RNAseq data	NA
78	GALT	GALT	glycosyltransferase	required for cell walls remodeling and synthesis	NA	our RNAseq data	NA
79	RRT	RRT	RG-I RHAMNOSYLTRANSFERASE	required for cell walls remodeling and synthesis	NA	our RNAseq data	NA
80	PPME	PPME	pectin methylesterase	required for cell walls remodeling and synthesis	NA	our RNAseq data	NA
81	XTH	XTH	xyloglucan endotransglucosylase/hydrolase	required for cell walls remodeling and synthesis	NA	our RNAseq data	NA
82	UXS	UXS	UDP-glucuronic acid decarboxylase	required for cell walls remodeling and synthesis	NA	our RNAseq data	NA
83	GAE	GAE	UDP-d-glucuronate 4-epimerase	required for cell walls remodeling and synthesis	NA	our RNAseq data	NA
84	XUT	XUT	xyloglucan-specific galacturonosyltransferase	required for cell walls remodeling and synthesis	NA	our RNAseq data	NA
85	PMEI	PMEI	pectin methyl esterase inhibitor	required for cell walls remodeling and synthesis	NA	our RNAseq data	NA
86	TBL	TBL	trichome birefringence-like	response to long-term cold stress	NA	our RNAseq data	NA
87	LOX	LOX1, LOX2, LOX3, LOX4, LOX5, LOX6, LOX7, LOX8, LOX9 LOX10, LOX11	lipoxygenase	jasmonic acid metabolism	Zhu et al., 2018	Characterization and Alternative Splicing Profiles of the Lipoxygenase Gene Family in Tea Plant (Camellia sinensis)	Plant And Cell Physiology
88	NCED	NCED	9-cis-epoxycarotenoid dioxygenase	ABA metabolism	Zhang et al., 2022	Systematic evaluation on cold resistance of tea plant (In Chinese)	CHINATEA
89	G3O2	G3O2	gibberellin 3β-dioxygenase	reversely inhibited under cold stress	Wang et al., 2021	Physiological Changes and Differential Gene Expression of Tea Plants ( Camellia sinensis (L.) Kuntze var. niaowangensis Q.H. Chen) Under Cold Stress	DNA Cell Biology
90	GR	GR	glutathione reductase	prevent oxidative damage caused by cold stress	Zhang et al., 2022	Systematic evaluation on cold resistance of tea plant (In Chinese)	CHINATEA
91	DHN	DHN1, DHN2	dehydrin	stress-inducible gene	Paul and Kumar, 2013	Dehydrin2 is a stress-inducible, whereas Dehydrin1 is constitutively expressed but up-regulated gene under varied cues in tea [Camellia sinensis (L.) O. Kuntze]	Molecular Biology Reports
92	JAZ	JAZ3, JAZ10, JAZ11	jasmonate-zim domain	key repressors in the jasmonic acid signal transduction pathway	Shen et al., 2020	Genome-Wide Analysis Reveals Stress and Hormone Responsive Patterns of JAZ Family Genes in Camellia Sinensis	International Journal Of Molecular Sciences
93	IPT	IPT5.2, IPT6.2	isopentenyl transferase	cytokinin (CK) signaling	Zhang et al., 2022	Genome-Wide Identification and Expression Analysis of Isopentenyl transferase Family Genes during Development and Resistance to Abiotic Stresses in Tea Plant (Camellia sinensis)	Plants-basel
94	PNPO	PNPO	pyridoxine 5’-phosphate oxidase	VB_6 metabolism	Zhang et al., 2022	Systematic evaluation on cold resistance of tea plant (In Chinese)	CHINATEA
95	GalLDH	GalLDH	L-galactono-1，4-lactone dehydrogenase	involved in the AsA biosynthesis pathway	Zhang et al., 2022	Systematic evaluation on cold resistance of tea plant (In Chinese)	CHINATEA
96	GalDH	GalDH	L -galactose dehydrogenase	involved in the AsA biosynthesis pathway	Zhang et al., 2022	Systematic evaluation on cold resistance of tea plant (In Chinese)	CHINATEA
97	DHAR	DHAR1, DHAR2	dehydroascorbate reductase	involved in the AsA biosynthesis pathway	Li et al., 2016	Expression profile analysis of ascorbic acid-related genes in response to temperature stress in the tea plant, Camellia sinensis (L.) O. Kuntze	Genetics And Molecular Research
98	GalUR	GalUR	d-galacturonate reductase	involved in the AsA biosynthesis pathway	Li et al., 2016	Expression profile analysis of ascorbic acid-related genes in response to temperature stress in the tea plant, Camellia sinensis (L.) O. Kuntze	Genetics And Molecular Research
99	AO	AO	ascorbate oxidase	related to the AsA recycling pathway	Li et al., 2016	Expression profile analysis of ascorbic acid-related genes in response to temperature stress in the tea plant, Camellia sinensis (L.) O. Kuntze	Genetics And Molecular Research
100	APX	APX	ascorbate peroxidase	related to the AsA recycling pathway	Liu et al., 2021	Effect of selenium on tea (Camellia sinensis) under low temperature: Changes in physiological and biochemical responses and quality	Environmental And Experimental Botany
101	MIOX	MIOX	myo-inositol oxygenase	involved in the AsA biosynthetic pathway	Li et al., 2016	Expression profile analysis of ascorbic acid-related genes in response to temperature stress in the tea plant, Camellia sinensis (L.) O. Kuntze	Genetics And Molecular Research
102	TTL	TTL	tetratricopeptide-repeat thioredoxin-like	regulates the transcript levels of several dehydration-responsive genes	NA	our RNAseq data	NA
103	CHXB	CHXB	β-carotene hydroxylase	involved in carotenoids biosynthesis	Yang et al., 2021	Low temperature effects on carotenoids biosynthesis in the leaves of green and albino tea plant (Camellia sinensis (L.) O. Kuntze)	Scientia Horticulturae
104	CHXE	CHXE	ε-carotene hydroxylase	involved in carotenoids biosynthesis	Yang et al., 2021	Low temperature effects on carotenoids biosynthesis in the leaves of green and albino tea plant (Camellia sinensis (L.) O. Kuntze)	Scientia Horticulturae
105	CRTISO	CRTISO	Carotenoid isomerase	involved in carotenoids biosynthesis	Yang et al., 2021	Low temperature effects on carotenoids biosynthesis in the leaves of green and albino tea plant (Camellia sinensis (L.) O. Kuntze)	Scientia Horticulturae
106	PDS	PDS	Phytoene desaturase	involved in carotenoids biosynthesis	Yang et al., 2021	Low temperature effects on carotenoids biosynthesis in the leaves of green and albino tea plant (Camellia sinensis (L.) O. Kuntze)	Scientia Horticulturae
107	ZDS	ZDS1	ζ-carotene desaturase	involved in carotenoids biosynthesis	Yang et al., 2021	Low temperature effects on carotenoids biosynthesis in the leaves of green and albino tea plant (Camellia sinensis (L.) O. Kuntze)	Scientia Horticulturae
108	PSY	PSY1	Phytoene synthase	involved in carotenoids biosynthesis	Yang et al., 2021	Low temperature effects on carotenoids biosynthesis in the leaves of green and albino tea plant (Camellia sinensis (L.) O. Kuntze)	Scientia Horticulturae
109	Z-ISO	Z-ISO	ζ-carotene isomerase	involved in carotenoids biosynthesis	Yang et al., 2021	Low temperature effects on carotenoids biosynthesis in the leaves of green and albino tea plant (Camellia sinensis (L.) O. Kuntze)	Scientia Horticulturae
110	TPS	TPS78, TPS11, TPS46, TPS43, TPS35, TPS16	Terpene synthases	key enzymes for the synthesis of terpenes in plants	Zhou et al., 2020	Analysis of Terpene Synthase Family Genes in Camellia sinensis with an Emphasis on Abiotic Stress Conditions	Scientific Reports
111	DXS	DXS1	1-deoxy-D-xylulose 5-phosphate synthase	involved in carotenoids biosynthesis	Yang et al., 2021	Low temperature effects on carotenoids biosynthesis in the leaves of green and albino tea plant (Camellia sinensis (L.) O. Kuntze)	Scientia Horticulturae
112	DXR	DXR	1-deoxy-D-xylulose 5-phosphate reductase	involved in carotenoids biosynthesis	Yang et al., 2021	Low temperature effects on carotenoids biosynthesis in the leaves of green and albino tea plant (Camellia sinensis (L.) O. Kuntze)	Scientia Horticulturae
113	HDS	HDS1	4-hydroxy-3-methylbut-2-en-l-yl diphosphate synthase	involved in carotenoids biosynthesis	Yang et al., 2021	Low temperature effects on carotenoids biosynthesis in the leaves of green and albino tea plant (Camellia sinensis (L.) O. Kuntze)	Scientia Horticulturae
114	LCY	LCYb1, LCYe	cyclase	involved in carotenoids biosynthesis	Yang et al., 2021	Low temperature effects on carotenoids biosynthesis in the leaves of green and albino tea plant (Camellia sinensis (L.) O. Kuntze)	Scientia Horticulturae
115	IPT	IPT5.2, IPT6.2	Isopentenyl transferase	related to cytokinin (CK) signaling	Zhang et al., 2022	Genome-Wide Identification and Expression Analysis of Isopentenyl transferase Family Genes during Development and Resistance to Abiotic Stresses in Tea Plant (Camellia sinensis)	Plants
116	CAM	CAM1, CAM2	calmodulin	Ca2+ sensor, play core roles in plant growth, development, and response to environmental stimuli	Kang et al., 2022; Huang et al., 2016	Genome-Wide Identification and Characterization of Calmodulin and Calmodulin-like Genes Family in Tea Plant and Their Roles under Abiotic Stress; Molecular Cloning and Expression of CaM Family Gene Cs CaMs Under Cold Stress in Tea Plant[Camellia sinensis(L.) O. Kuntze]	Forests; Journal of Plant Genetic Resources
117	CBL	CBL1, CBL3, CBL5, CBL9,	calcineurin B-like protein	sensing and transduction of cold signaling of plants	Wang et al., 2020	Characterization of CBL-CIPK signaling complexes and their involvement in cold response in tea plant	Plant Physiology
118	CML	CML1, CML2, CML3, CML4, CML5, CML6, CML7, CML8, CML9, CML10, CML11, CML12, CML15, CML19, CML20, CML21, CML22, CML23, CML24, CML25, CML26, CML27, CML29, CML31, CML32, CML33, CML34, CML35, CML36, CML37, CML38, CML39, CML40, CML41, CML42, CML43, CML44, CML45, CML46, CML48, CML50, CML51, CML52, CML55, CML56, CML57, CML60	calmodulin-like protein	Ca2+ sensor, play core roles in plant growth, development, and response to environmental stimuli	Kang et al., 2022	Genome-Wide Identification and Characterization of Calmodulin and Calmodulin-like Genes Family in Tea Plant and Their Roles under Abiotic Stress	Forests
119	LEA	LEA1-33	late embryogenesis abundant	play important roles in plant growth, development and stress responses	Wang et al., 2019	The late embryogenesis abundant gene family in tea plant (Camellia sinensis): Genome-wide characterization and expression analysis in response to cold and dehydration stress	Plant Physiology And Biochemistry
120	P5CS	P5CS	P5C synthetase	involved in proline biosynthesis	Ban et al., 2017	Comparative analysis of the response and gene regulation in cold resistant and sensi tive tea plants	PloS One
121	AQP	TIP1:3, XIP, PIP1:4, PIP1:2, NIP6:1, PIP2:4, SIP1:1, NIP1:1	aquaporin protein	cold response	Yue et al., 2014	Molecular cloning and expression analysis of tea plant aquaporin (AQP) gene family	Plant Physiology And Biochemistry
122	FAD	FAD7, FAD8	fatty acid desaturase	unsaturated fatty acid biosynthesis	Ding et al., 2016	The differences between two tea varieties in their response to natural cold conditions	Journal Of Horticultural Science & Biotechnology
123	GS	GS	Glutamine synthetase	key gene of glutamine accumulation in tea leaves	Rana et al., 2008	Expression of tea cytosolic glutamine synthetase is tissue specific and induced by cadmium and salt stress	Biologia Plantarum
124	ARG	ARG	antibiotic resistance gene	cold response	Zhang et al., 2022	Systematic evaluation on cold resistance of tea plant (In Chinese)	CHINATEA
125	HCT	HCT	Hydroxycinnamoyl transferase	involved in the biosynthesis pathways of polyphenols and flavonoids	Sun et al., 2018	Molecular Identification and Characterization of Hydroxycinnamoyl Transferase in Tea Plants ( Camellia sinensis L.)	International Journal of Molecular Sciences
126	CesA	CesA	Cellulose synthase A	responsible for the synthesis of cellulose	Li et al., 2022	Genome-Wide Characterization of the Cellulose Synthase Gene Superfamily in Tea Plants (Camellia sinensis)	Phyton-international Journal Of Experimental Botany
127	psbA	psbA	photosystem II reaction center protein A	light reaction	Shi et al., 2019	Effect of Freezing on Photosystem II and Assessment of Freezing Tolerance of Tea Cultivar	Plants-basel
128	psbD	psbD	photosystem II reaction center protein D	light reaction	Shi et al., 2019	Effect of Freezing on Photosystem II and Assessment of Freezing Tolerance of Tea Cultivar	Plants-basel
